# Supplementary material
Source: PubMed Central journal article supplement (PMC6151290)
Supplement: NIHMS961983-supplement-supplement_1.pdf [file NIHMS961983-supplement-supplement_1.pdf]

## 1 **Supplemental materials**

### 2 **Methods**

#### 3 **Partial occlusion**

4 The amblyopic brain relies primarily on signals from the stronger dominant eye and suppresses  
5 signals from the weaker affected eye with reduced vision. To remove this obstacle to binocular  
6 vision, we asked our participants to wear a Bangerter blur filter (Ryser Optik, St. Gallen,  
7 Switzerland) over the sound eye in order to reduce its crowded visual acuity to roughly 60%, or  
8 two lines on a standard logMAR letter chart (National Vision Research Institute of Australia,  
9 1978), worse than that of the fellow amblyopic eye. Our previous work with neurotypical  
10 observers suggests that placing this type of filter before one eye preserves stereopsis at low  
11 spatial frequencies<sup>3</sup>. Throughout the course of the video game intervention, the Bangerter filter  
12 was adjusted as visual acuity improved.

13

#### 14 **Participants**

15 Twenty-one adults with amblyopia participated (age range, 19-79 years; mean age,  $34.5 \pm [SD]$   
16 13.5 years; male, 8; female, 13). Inclusion criteria included: (1) all forms of amblyopia,  
17 including strabismic, anisometropic, refractive, deprivation, and astigmatism-related amblyopia;  
18 and (2) interocular visual acuity difference of 0.1 logMAR or more. Exclusion criteria included  
19 any pathological eye conditions. The maculae of all participants were assessed as normal, and  
20 they all had clear ocular media. All our participants, except SAN1 who had nystagmus, had  
21 normal vision in the preferred eye. Their visual characteristics are summarized in Table S1  
22 (sample size, 21: non-strabismic amblyopia, 11; strabismic amblyopia, 10).

23

24 **General procedures**

25 In the main experiment, participants were required to play stereoscopic 3D video games for a  
26 total of 40 hours, 2 hours per session, over 4-6 weeks in our research laboratory. First-person  
27 shooter action video games were used, such as Killzone 3 (Sony Computer Entertainment),  
28 SOCOM 4: U.S. Navy Seals (Sony Computer Entertainment), Ratchet & Clank (Sony Computer  
29 Entertainment), and Crysis 3 (Electronic Arts). The stronger dominant eye was blurred with  
30 Bangerter foils (Ryser Optik, St. Gallen, Switzerland) to a level of roughly 0.2 logMAR worse  
31 than crowded visual acuity in the amblyopic eye. Note that the Bangerter foils provided to our  
32 participants were based on our clinical measurements, not the filter designation provided by the  
33 manufacturer. The filters were applied onto a plano lens which was then taped to a trial frame so  
34 that each individual participant used the same prescribed blurring lens in all gaming sessions. A  
35 32-inch Panasonic active 3D television (model, TC-L32DT30; resolution, 1920 x 1080; refresh  
36 rate, 120 Hz) and a pair of active liquid crystal shutter glasses (model, TY-EW3D3MU;  
37 Panasonic, Japan) were used to display stereoscopic game content with a Sony PlayStation 3  
38 system (Sony Interactive Entertainment, Japan). The viewing distance was 1 m, but participants  
39 were allowed to view the screen at a shorter distance, normally not less than 50cm, if they found  
40 it too blurry.

41 We measured visual acuity (Fig 1A, inset) and stereoacuity (Fig 1D, inset) in pre-training  
42 and post-training assessment sessions. All visual stimuli were displayed on a 21-inch flat Sony  
43 F520 monitor screen at 1800 x 1440 resolution and 85 Hz refresh rate. Participants wore full  
44 optical correction for all training and assessment sessions. Appropriate near addition was  
45 provided for those participants with presbyopia.

46

47 **Stereoacuity**

48 An experimental set-up similar to that in our recent studies<sup>3</sup> was used to measure stereoacuity.  
49 The visual stimulus was comprised of two horizontally separated black squares (Fig 1D). At the  
50 center of each square, there was a target Gabor patch surrounded by four reference Gabor  
51 patches. A custom-built 4-mirror haploscope was used to present a half monitor screen to each  
52 eye (i.e. the left square to the left eye and the right square to the right eye). Binocular disparity  
53 was introduced by shifting the two target patches, one in each square, in opposite horizontal  
54 directions. To eliminate any potential monocular cues, the position and carrier phase of each  
55 target and reference Gabor patch were randomly jittered based on a uniform distribution (vertical  
56 and horizontal position range,  $\pm 200$ -1600 arcsec; phase range, 0-360°). The mean luminance of  
57 the stimuli was 55 cd/m<sup>2</sup> and the contrast of each Gabor patch was 99%. The visual task was to  
58 determine the stereoscopic depth of the target Gabor (in front or behind) relative to the four  
59 adjacent reference Gabor patches. A trial-by-trial audio feedback was provided for each response.

60 For each trial, the amount of binocular disparity between the target Gabors presented to  
61 each eye was determined by two interleaved adaptive staircases to track the threshold: one was  
62 for crossed disparity (the target patch appears in front of the reference patches), while the other  
63 was for uncrossed disparity (the target patch appears behind the reference patches). The trials  
64 were divided into triplets: three correct responses decreased the disparity magnitude by one unit  
65 step, two correct responses left the disparity unchanged, and only one or no correct response  
66 increased the disparity by two unit steps. The starting disparity was roughly two times the  
67 individual observer's threshold disparity (or two-third of the maximum measurable disparity, see  
68 below, for the stereo-blind participants), and the step size was roughly one-third to half of the

69 threshold disparity. Stereoacuity was defined as the disparity at the 84% correct response rates  
70 ( $d'=1$ ) obtained by fitting a Probit function. Each run consisted of 160 response trials: 75 trials of  
71 crossed disparity, 75 trials of uncrossed disparity, and 10 trials with zero disparity.

72         The stimulus spatial scale was manipulated by adjusting the physical size on the screen  
73 and varying the viewing distance: 50 cm (V1), 1 m (V2) or 2 m (V5-V15). For V5 stimuli  
74 viewed at 2 m, the envelope size was 7 arcmin, the reference-target center-to-center distance was  
75 48 arcmin when positional jittering was disabled, the 'E' size was 25 x 25 arcmin, and the square  
76 frame was 197.3 arcmin. The inter-pixel distance was 20 arcsec at a viewing distance of 2 m (50  
77 cm, 80 arcsec); sub-pixel accuracy was achieved by contrast manipulation. The maximum  
78 measurable disparities (crossed or uncrossed) were 8000, 4000, 2000, and 1000 arcsec for V1,  
79 V2, V5 and V10, respectively.

80

81

82

83 **Table S1.** Visual profile of amblyopia. Abbreviations: (1) Type of amblyopia. S, strabismic  
 84 amblyopia; A, anisometropic amblyopia; R, refractive amblyopia; M, astigmatism-related  
 85 amblyopia; C, congenital cataract; N, nystagmus. (2) Cover test. ExoT, exotropia; EsoT, esotropia;  
 86 HyperT, hypertropia; ExoP, exophoria; EsoP, esophoria; NMD, no movement detected.

| #  | Group | Observer | Gender | Age (yrs) | Type    | Eye    | Refractive error                   | Visual acuity - Crowded [isolated] (Snellen)                                             | Cover test (at 6m)                                                |
|----|-------|----------|--------|-----------|---------|--------|------------------------------------|------------------------------------------------------------------------------------------|-------------------------------------------------------------------|
| 1  | NS    | MBL      | M      | 28.3      | A       | R<br>L | -2.50<br>+0.75                     | 20/12.5<br>20/80 <sup>-2</sup> (20/63 <sup>-2</sup> )                                    | NMD                                                               |
| 2  | NS    | JTL      | M      | 36.2      | A       | R<br>L | -1.50/-0.25x160<br>+0.75/-0.50x165 | 20/16 <sup>+1</sup><br>20/40 <sup>-2</sup> (20/40 <sup>+2</sup> )                        | 4 <sup>Δ</sup> ExoP                                               |
| 3  | NS    | TXY      | F      | 22.7      | A       | R<br>L | -2.00/-1.25x15<br>-2.25            | 20/40 <sup>+1</sup> (20/32 <sup>-2</sup> )<br>20/16 <sup>+2</sup>                        | NMD                                                               |
| 4  | NS    | VXH      | F      | 20.6      | A       | R<br>L | +2.25/-1.00x120<br>-0.25           | 20/40 <sup>+2</sup> (20/40 <sup>+2</sup> )<br>20/16 <sup>+2</sup>                        | NMD                                                               |
| 5  | NS    | KRL      | F      | 20.6      | A       | R<br>L | +3.50/-0.25x165<br>plano/-0.75x20  | 20/32 <sup>-1</sup> (20/25 <sup>-2</sup> )<br>20/12.5 <sup>-2</sup>                      | 4 <sup>Δ</sup> EsoP                                               |
| 6  | NS    | SCC      | M      | 49.3      | A       | R<br>L | +0.25<br>+1.75                     | 20/16 <sup>-1</sup><br>20/25 <sup>-1</sup> (20/25 <sup>-1</sup> )                        | NMD                                                               |
| 7  | NS    | EEY      | F      | 20.3      | A       | R<br>L | -0.25/-0.25x175<br>+5.50/-1.50x60  | 20/16 <sup>+2</sup><br>20/25 <sup>+2</sup> (20/25 <sup>+2</sup> )                        | 4 <sup>Δ</sup> ExoP                                               |
| 8  | NS    | PKT      | F      | 19.3      | A       | R<br>L | +3.25/-0.25x135<br>+1.25/-0.50x140 | 20/25 <sup>+2</sup> (20/25 <sup>+2</sup> )<br>20/12.5 <sup>+1</sup>                      | NMD                                                               |
| 9  | NS    | MXB      | F      | 38.4      | A       | R<br>L | +6.25/-1.00x110<br>+5.25/-1.00x75  | 20/20 <sup>-1</sup> (20/20 <sup>+1</sup> )<br>20/16 <sup>+2</sup>                        | 5 <sup>Δ</sup> EsoP                                               |
| 10 | NS    | JBS      | F      | 25.6      | C       | R<br>L | -7.00/-1.75x180 (IOL)<br>plano     | 20/63 <sup>+2</sup> (20/50 <sup>-1</sup> )<br>20/16 <sup>+2</sup>                        | 5 <sup>Δ</sup> ExoP                                               |
| 11 | NS    | YXC      | F      | 48.1      | R, M    | R<br>L | -14.75/-3.50x75<br>-2.25/-1.75x160 | 20/40 (20/40 <sup>-1</sup> )<br>20/16 <sup>-2</sup>                                      | L 4 <sup>Δ</sup> HyperP                                           |
| 12 | S     | RCS      | M      | 79.1      | S       | R<br>L | +1.75/-2.75x5<br>+1.50/-1.50x160   | 20/16 <sup>+2</sup><br>20/80 <sup>-1</sup> (20/40 <sup>-2</sup> )                        | L 2 <sup>Δ</sup> EsoT, L 2 <sup>Δ</sup> HyperT                    |
| 13 | S     | CAA      | M      | 28.0      | S       | R<br>L | +1.25/-0.75x45<br>+0.75/-0.50x160  | 20/20<br>20/63 <sup>+1</sup> (20/32 <sup>-1</sup> )                                      | L 6 <sup>Δ</sup> ExoT, R 1 <sup>Δ</sup> HyperT (Intermittent)     |
| 14 | S     | DJS      | F      | 33.8      | S       | R<br>L | -1.25<br>-4.00                     | 20/50 <sup>+2</sup> (20/32 <sup>+2</sup> )<br>20/16 <sup>-1</sup>                        | R 12 <sup>Δ</sup> ExoT                                            |
| 15 | S     | MSL      | M      | 42.8      | S       | R<br>L | +0.25/-0.50x50<br>-0.25/-0.25x130  | 20/10 <sup>-2</sup><br>20/40 <sup>-2</sup> (20/32 <sup>+2</sup> )                        | L 5 <sup>Δ</sup> EsoT                                             |
| 16 | S     | HMK      | F      | 36.3      | S       | R<br>L | +0.25<br>+0.25                     | 20/40 <sup>-1</sup> (20/32 <sup>-2</sup> )<br>20/16 <sup>+1</sup>                        | R 6 <sup>Δ</sup> EsoT                                             |
| 17 | S     | JED      | M      | 40.4      | S       | R<br>L | +0.25<br>+0.50/-0.25x180           | 20/12.5<br>20/32 <sup>+2</sup> (20/20)                                                   | L 8 <sup>Δ</sup> EsoT                                             |
| 18 | S     | RXS      | F      | 38.4      | S       | R<br>L | -4.50/-0.75x20<br>+0.50/-0.75x165  | 20/25 <sup>-1</sup> (20/20 <sup>-2</sup> )<br>20/16 <sup>-1</sup>                        | R 3 <sup>Δ</sup> EsoT, L 4 <sup>Δ</sup> HyperT                    |
| 19 | S     | VHC      | F      | 29.9      | S, A    | R<br>L | +2.75/-1.00x180<br>+0.75/-0.50x175 | 20/160 <sup>+2</sup> (20/125 <sup>+2</sup> )<br>20/16 <sup>+2</sup>                      | R 12 <sup>Δ</sup> ExoT                                            |
| 20 | S     | QXD      | M      | 33.2      | S, A    | R<br>L | -1.00/-0.50x175<br>+2.25/-0.75x175 | 20/12 <sup>-2</sup><br>20/32 <sup>-1</sup> (20/32 <sup>+1</sup> )                        | L 4 <sup>Δ</sup> ExoT (Intermittent)                              |
| 21 | S     | SLO      | F      | 33.4      | S, A, N | R<br>L | +3.50<br>+1.50                     | 20/25 <sup>-2</sup> (20/25 <sup>+2</sup> )<br>20/25 <sup>+2</sup> (20/20 <sup>+1</sup> ) | R 8 <sup>Δ</sup> ExoT, R 6 <sup>Δ</sup> HyperT, latent nystagmus* |
